# Supplementary material for: Exploring the Association of Burning Mouth Syndrome with Depressive and Anxiety Disorders in Middle-Aged and Older Adults: A Systematic Review
Source: MDPI journal article supplement (doi:10.3390/jpm13061014), 2023-06-19
Supplement: s1 [file s1]

**Table S1.** Search strategy used in the US National Library of Medicine (PubMed) and Medical Literature Analysis and Retrieval System Online (MEDLINE) and adapted to the other sources, according to selected descriptors.

| Strategy                  | Descriptors used                                                                                                                                                                               |
|---------------------------|------------------------------------------------------------------------------------------------------------------------------------------------------------------------------------------------|
| # 1                       | (elders[tiab]) OR (older adults[tiab]) OR (elderly[tiab]) OR (oldest old[tiab]) OR (youngest old[tiab]) OR (middle-aged[tiab]) OR (mid age[tiab]) OR (middle age[tiab]) OR (middle aged[tiab]) |
| # 2                       | (burning mouth syndrome[tiab]) OR (BMS[tiab]) OR (glossalgia[tiab])                                                                                                                            |
| # 3                       | (emotional stress[tiab]) OR (depression[tiab]) OR (anxiety[tiab]) OR (suicidal behavior[tiab]) OR (suicidal ideation[tiab])                                                                    |
| # 4                       | (review[tiab]) OR (systematic review[tiab]) OR (narrative review[tiab]) OR (meta-analysis[tiab]) OR (editorial[tiab]) OR (letter[tiab]) OR (perspective[tiab]) OR (commentary[tiab])           |
| #1 AND #2 AND #3 NOT #4   |                                                                                                                                                                                                |
| Updated to: April 2, 2023 |                                                                                                                                                                                                |
